# Supplementary material for: Co-Expression Network Analysis of Spleen Transcriptome in Rock Bream (Oplegnathus fasciatus) Naturally Infected with Rock Bream Iridovirus (RBIV)
Source: MDPI journal article supplement (doi:10.3390/ijms21051707), 2020-03-02

**Figure S5.** The amplification and standard curve of MCP gene of RBIV by qPCR. (A) Amplification of 10-fold dilution of plasmid DNA ranging from  $10^8$  to  $10^1$  copies/ul, (B) Standard curve generated by plotting Ct values versus 10-fold dilutions of plasmid DNA from  $10^8$  to  $10^1$  copies/ul. 1,  $1 \times 10^1$  copies/ul; 2,  $1 \times 10^2$  copies/ul; 3,  $1 \times 10^3$  copies/ul; 4,  $1 \times 10^4$  copies/ul; 5,  $1 \times 10^5$  copies/ul; 6,  $1 \times 10^6$  copies/ul; 7,  $1 \times 10^7$  copies/ul; 8,  $1 \times 10^8$  copies/ul; NC, no-template DNA

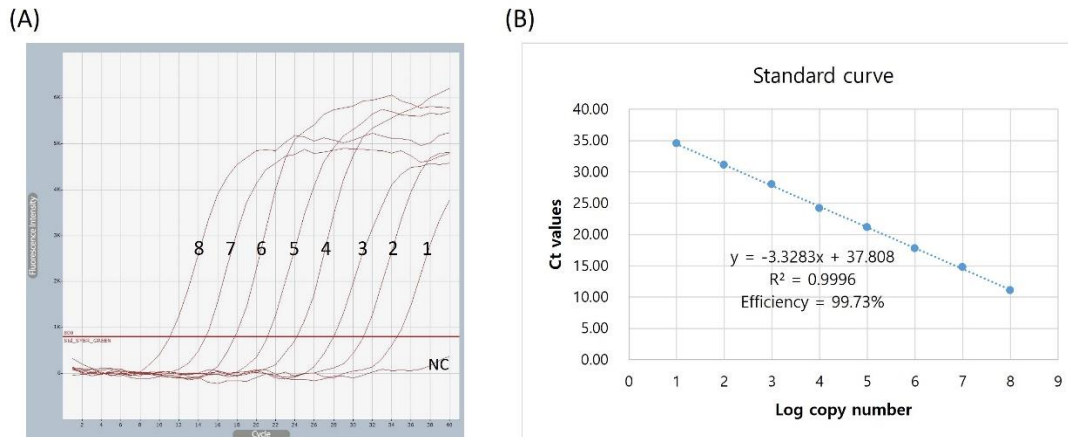

Supplement: s1 [file s1]
