# Supplementary material for: Co-Expression Network Analysis of Spleen Transcriptome in Rock Bream (Oplegnathus fasciatus) Naturally Infected with Rock Bream Iridovirus (RBIV)
Source: MDPI journal article supplement (doi:10.3390/ijms21051707), 2020-03-02

**Figure S3.** Relative concentrations of metabolites analyzed with NMR. Red dot and line represent the mean and SD value, respectively.

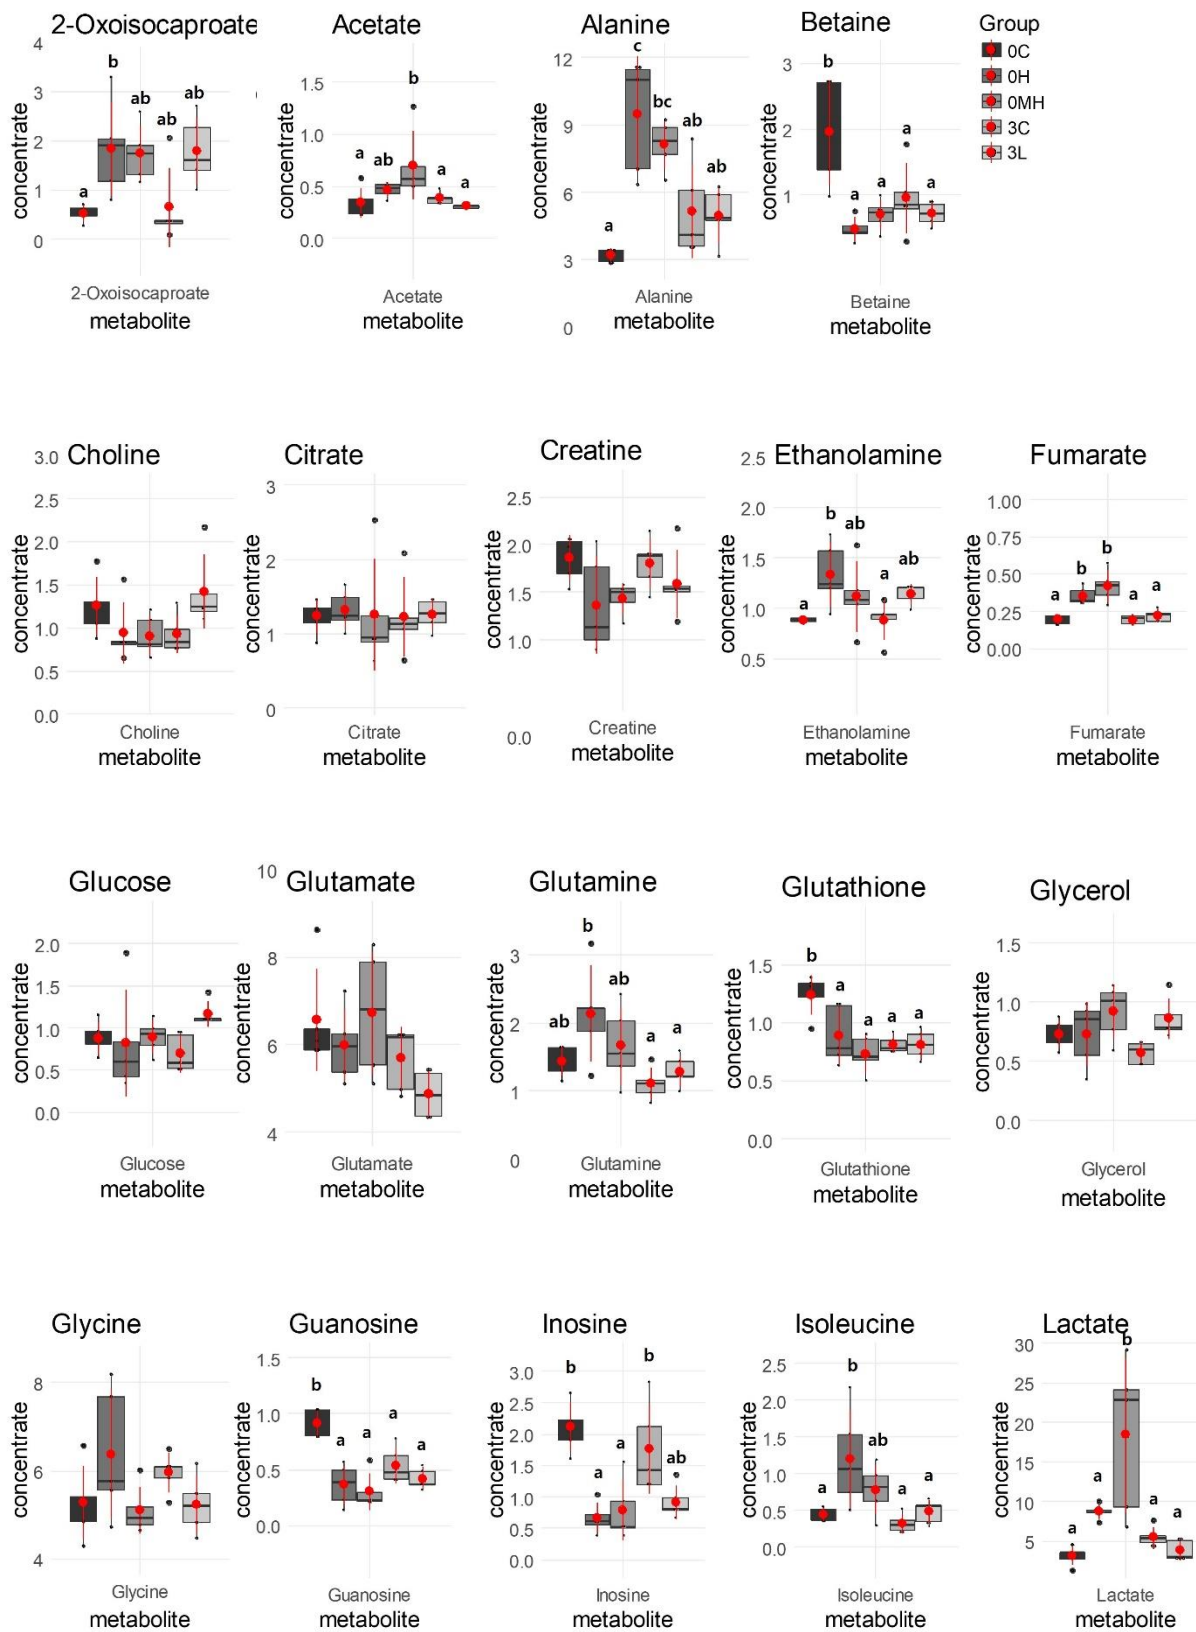

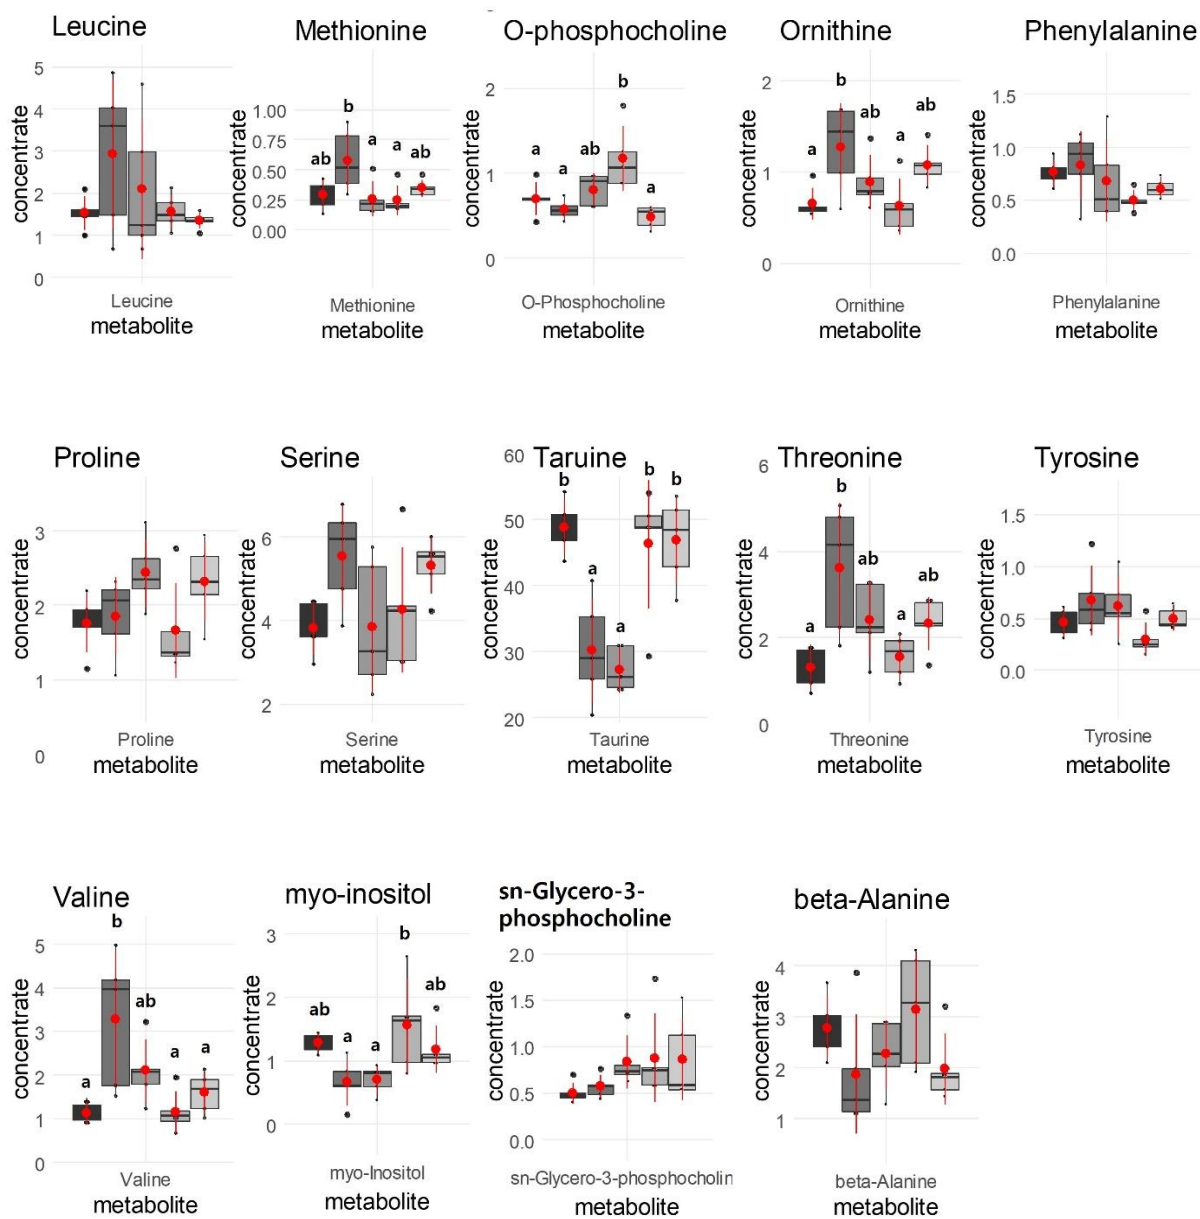

Supplement: s1 [file s1]
