# Supplementary material for: Co-Expression Network Analysis of Spleen Transcriptome in Rock Bream (Oplegnathus fasciatus) Naturally Infected with Rock Bream Iridovirus (RBIV)
Source: MDPI journal article supplement (doi:10.3390/ijms21051707), 2020-03-02

**Figure S2.** (A) OPLS-DA score plot of spleen spectra from rock bream ( $R^2X = 0.808$ ,  $R^2Y = 0.68$ ,  $Q^2 = 0.274$ ). (B) VIP scores of contributed metabolites in PLSDA model (top 15 metabolites). Colored boxes indicate relative concentrations of corresponding metabolites in each group.

(A)

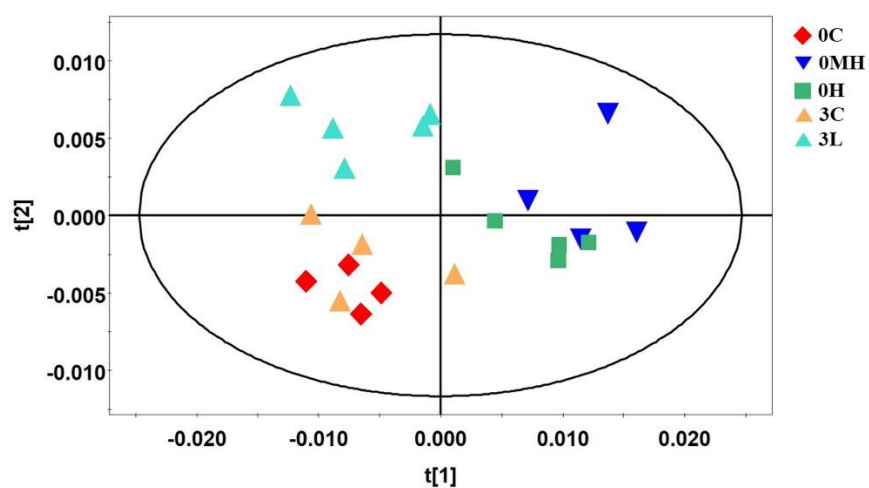

(B)

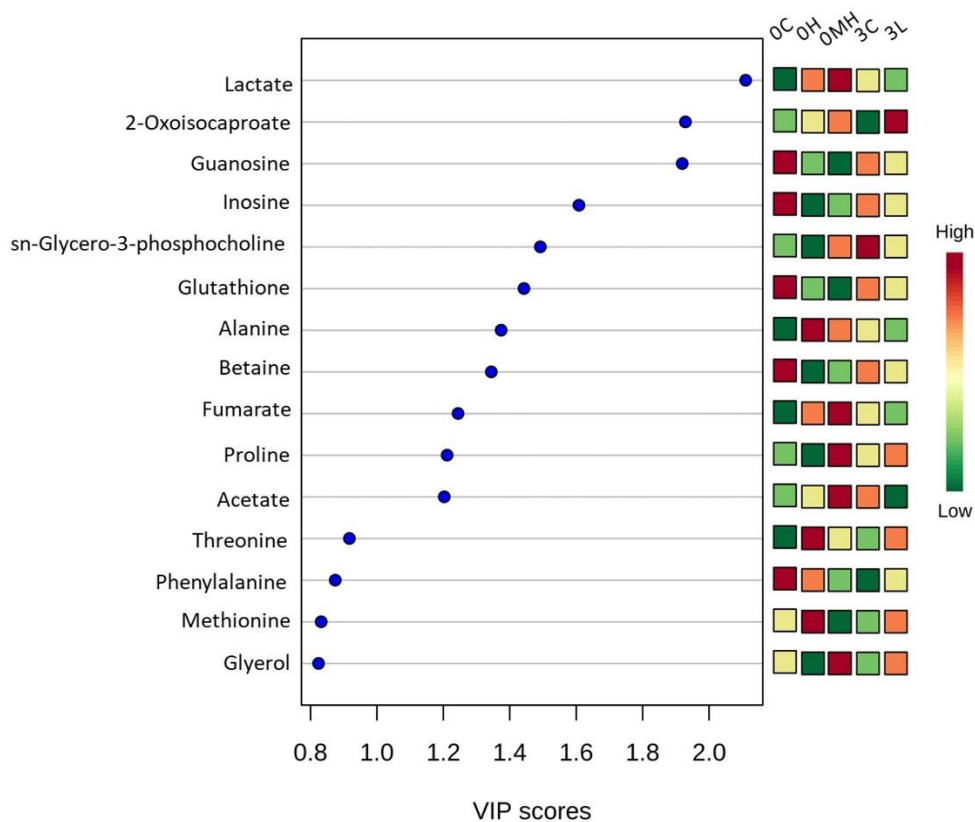

Supplement: s1 [file s1]
