# Supplementary material for: Co-Expression Network Analysis of Spleen Transcriptome in Rock Bream (Oplegnathus fasciatus) Naturally Infected with Rock Bream Iridovirus (RBIV)
Source: MDPI journal article supplement (doi:10.3390/ijms21051707), 2020-03-02

**Figure S4.** Validation of selected four genes by qPCR. The y-axis represents  $\log_2$ FC value of gene expression and the x-axis represents DEG groups of 0MH, 0H, 3C, and 3L relative to 0C group. White and gray bars correspond to qPCR and RNA-seq, respectively. Bar and error bar represent mean value and standard deviation (SD), respectively, of five samples in each group.

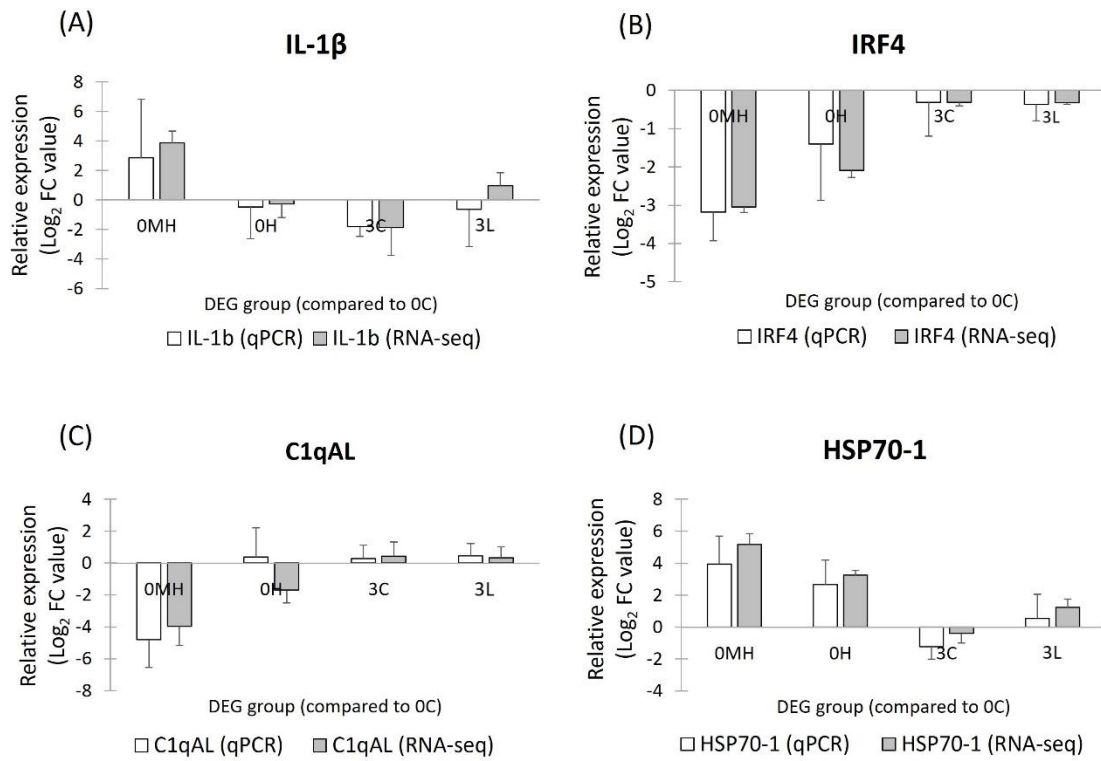

Supplement: s1 [file s1]
